# Supplementary material for: Development and validation of an immunoperoxidase antigen detection test for improved diagnosis of rabies in Indonesia
Source: PLoS Negl Trop Dis. 2017 Nov 13;11(11):e0006079. doi: 10.1371/journal.pntd.0006079 (PMC5703572; doi:10.1371/journal.pntd.0006079)
Supplement: S1 Dataset — (XLSX) [file pntd.0006079.s002.xlsx]

## Sheet: Bayesian statistics RIAD
	No.	Epi. No	Province	Year	District	Subdistrict	Village	Animal	RAS	SEX	AGE	RIAD-Formalin	RIAD-Aceton	FAT	SST
1	18	478	SUMBAR	2012	PASAMAN	DUO KOTO	Batang Tuhur	Dog	Lokal	F	2 yr	Neg	Neg	Neg	Neg
2	21	515	SUMBAR	2012	50 KOTA	GUGUK	Guguak Nunang	Dog	Lokal	M	Adult	Neg	Neg	Neg	Neg
3	52	202	SUMBAR	2013	PDG.PARIAMAN	-	SUNGAI SARIAK	Dog	Local	F	-	Neg	Neg	Neg	Neg
4	70	424	SUMBAR	2013	50 KOTA	LUAK	BUKIK GOMBAK	Dog	Mini Pinc	M	7 mth	Neg	Neg	Neg	Neg
5	78	503	SUMBAR	2013	AGAM	IV NAGARI	SITALANG	Dog	Local	M	4 yr	Neg	Neg	Neg	Neg
6	96	756	SUMBAR	2013	TANAH DATAR	SALIMPAUNG	TABEK PATAH	Dog	Local	F	Adult	Neg	Neg	Neg	Neg
7	101	14	SUMBAR	2014	BUKITTINGGI	GUGUK PANJANG	PARAK TINGGI	Dog	Mix	M	1,5 th	Neg	Neg	Neg	Neg
8	102	15	SUMBAR	2014	AGAM	EMPAT ANGKAT	Panampung	Dog	Local	M	2 yr	Neg	Neg	Neg	Neg
9	112	37	SUMBAR	2014	KOTA PADANG	PADANG SELATAN	KOMPLEK CENDANA	Dog	Lokal	F	1 mth	Neg	Neg	Neg	Neg
10	125	67	SUMBAR	2014	LIMA PULUH KOTA	GUGUK	GUGUK VII KOTO	Dog	Lokal	M	10 mth	Neg	Neg	Neg	Neg
11	6	215	SUMBAR	2012	PASAMAN BARAT	-	Kampung Cubadak	Dog	Lokal	M	3 yr	Pos	Neg	Neg	Neg
12	12	406	SUMBAR	2012	AGAM	CANDUNG	Kubang Duo	Dog	Lokal	M	2,5 yr	Pos	Neg	Neg	Neg
13	16	472	SUMBAR	2012	DHARMASRAYA	TIMPEH	Beringin Sakti	Dog	Lokal	F	1 yr	Pos	Neg	Neg	Neg
14	65	344	SUMBAR	2013	BUKITTINGGI	MANDIANGIN KOTO SELAYAN	GUGUK BULEK	Dog	Mix	M	Adult	Pos	Neg	Neg	Neg
15	68	368	SUMBAR	2013	50 KOTA	HARAU	LUBUAK BATINGKOK	Dog	-	-	-	Pos	Neg	Neg	Neg
16	40	86	SUMBAR	2013	PESISIR SELATAN	BAYANG	TALAOK	Dog	Local	M	7 mth	ND	Pos	Pos	Neg
17	46	158	SUMBAR	2013	PAYAKUMBUH	PAYAKUMBUH TIMUR	PAYOBASUNG	Dog	Local		Puppy	Neg	Pos	Pos	Neg
18	39	80	SUMBAR	2013	AGAM	PALUPUH	KOTO RANTANG	Dog	-	M	-	Neg	Pos	Pos	Pos
19	3	27	SUMBAR	2012	KOTA PADANG	PAUH	Piai Tangan	Dog	Lokal	F	2 th	Pos	Pos	Pos	Neg
20	5	202	SUMBAR	2012	50 KOTA	AKABILURU	Sariak Laweh	Dog	Lokal	M	2 yr	Pos	Pos	Pos	Neg
21	7	224	SUMBAR	2012	AGAM	TANJUNG RAYA	Sei Batang	Dog	Lokal	M	5 mth	Pos	Pos	Pos	Neg
22	8	263	SUMBAR	2012	KOTA SOLOK	TANJUNG HARAPAN	Nan Balimo	Dog	Lokal	M	-	Pos	Pos	Pos	Neg
23	10	396	SUMBAR	2012	KOTA PAYAKUMBUH	PAYAKUMBUH BARAT	Ibuh	Dog	Lokal	F	5 mth	Pos	Pos	Pos	Neg
24	13	412	SUMBAR	2012	AGAM	PALEMBAYAN	Salareh Aia	Dog	Lokal	M	2 mth	Pos	Pos	Pos	Neg
25	14	442	SUMBAR	2012	AGAM	TANJUNG RAYA	Kukuban	Dog	Lokal	M	Young	Pos	Pos	Pos	Neg
26	24	16	SUMBAR	2013	TANAH DATAR	X KOTO	PANINJAUAN	Dog	-	M	-	Pos	Pos	Pos	Neg
27	27	48	SUMBAR	2013	KOTA SOLOK	TANJUNG HARAPAN	LAING	Dog	Lokal	F	1 yr	Pos	Pos	Pos	Neg
28	35	69	SUMBAR	2013	SOLOK	PANTAI CERMIN	SURIAN	Dog	Local	M	1 yr	Pos	Pos	Pos	Neg
29	37	76	SUMBAR	2013	50 KOTA	PANGKALAN KOTO BARU	NAGARI KOTO ALAM	Dog	Mix	M	Adult	Pos	Pos	Pos	Neg
30	44	135	SUMBAR	2013	50 KOTA	LAREH SAGO HALABAN	SITANANG	Dog	-	M	-	Pos	Pos	Pos	Neg
31	53	211	SUMBAR	2013	KOTA SOLOK	TANJUNG HARAPAN	KAMPUNG JAWA	Dog	Local	M	5 mth	Pos	Pos	Pos	Neg
32	55	241	SUMBAR	2013	AGAM	TILATANG KAMANG	SAWAH DANGKA	Dog	Local	F	Adult	Pos	Pos	Pos	Neg
33	56	244	SUMBAR	2013	PAYAKUMBUH	PAYAKUMBUH TIMUR	BALAI JARING	Dog	-	M	Puppy	Pos	Pos	Pos	Neg
34	57	273	JAMBI	2013	SUNGAI PENUH	KUMUN DEBAI	AIR TELUH	Dog	Local	-	-	Pos	Pos	Pos	Neg
35	59	281	SUMBAR	2013	PESISIR SELATAN	SUTERA	SARIAK	Dog	Local	F	3 mth	Pos	Pos	Pos	Neg
36	61	312	SUMBAR	2013	AGAM	EMPAT ANGKAT	BALAI GURAH	Dog	Local	-	-	Pos	Pos	Pos	Neg
37	64	334	SUMBAR	2013	AGAM	BASO	PADANG TAROK	Dog	Local	M	Adult	Pos	Pos	Pos	Neg
38	66	362	SUMBAR	2013	SAWAH LUNTO	-	KANDI	Dog	-	-	-	Pos	Pos	Pos	Neg
39	69	374	SUMBAR	2013	50 KOTA	AKABILURU	SUAYAN TINGGI	Dog	Local	M	6 mth	Pos	Pos	Pos	Neg
40	76	487	SUMBAR	2013	TANAH DATAR	TANJUNG BARU	TANJUNG ALAM	Dog	Local	M	9 mth	Pos	Pos	Pos	Neg
41	82	615	SUMBAR	2013	50 KOTA	GUGUK	KUBANG TUNGKEK	Dog	Local	M	7 mth	Pos	Pos	Pos	Neg
42	85	664	SUMBAR	2013	AGAM	TILATANG KAMANG	KOTO TANGAH	Dog	-	M	3 th	Pos	Pos	Pos	Neg
43	86	691	SUMBAR	2013	AGAM	CANDUNG	LASI MUDO	Dog	Local	F	8 bl	Pos	Pos	Pos	Neg
44	87	692	SUMBAR	2013	AGAM	BASO	SIMARASOK	Dog	Local	M	2 yr	Pos	Pos	Pos	Neg
45	91	726	SUMBAR	2013	50 KOTA	HARAU	TANJUNG PATI	Dog	Local	M	2 yr	Pos	Pos	Pos	Neg
46	92	732	SUMBAR	2013	AGAM	EMPAT ANGKAT	BIARO GADANG	Dog	Local	M	1 th	Pos	Pos	Pos	Neg
47	95	751	SUMBAR	2013	PESISIR SELATAN	RANAH PESISIR	PELANGAI	Dog	Local	F	4 mth	Pos	Pos	Pos	Neg
48	98	4	SUMBAR	2014	SAWAH LUNTO	TALAWI	SALAK	Dog	Local	-	2 yr	Pos	Pos	Pos	Neg
49	99	5	SUMBAR	2014	50 KOTA	HARAU	Pilubabg	Dog	Local	M	2 mth	Pos	Pos	Pos	Neg
50	100	13	SUMBAR	2014	50 KOTA	HARAU	Bukik Limbuku	Dog	Local	-	3 yr	Pos	Pos	Pos	Neg
51	106	20	SUMBAR	2014	PAYAKUMBUH	PAYAKUMBUH SELATAN	PAKAN SALASA	Dog	Local	F	puppy	Pos	Pos	Pos	Neg
52	113	38	SUMBAR	2014	KOTA PDG.PANJANG	PDG.PJG.TIMUR	KOTO KATIAK	Dog	Lokal	M	4 mth	Pos	Pos	Pos	Neg
53	116	44	SUMBAR	2014	KAB. 50 KOTA	MUNGKA	TALANG MAUR	Dog	Lokal	M	9 mth	Pos	Pos	Pos	Neg
54	117	51	SUMBAR	2014	AGAM	TILATANG KAMANG	JRG.III KP-MATO AIA GADUT	Dog	Lokal	M	6 mth	Pos	Pos	Pos	Neg
55	118	53	SUMBAR	2014	AGAM	AMPEK NAGARI	LUBUAK ARO	Dog	Lokal	M	5 mth	Pos	Pos	Pos	Neg
56	119	54	SUMBAR	2014	AGAM	LUBUK BASUNG	PADANG SANO	Dog	Lokal	M	6 mth	Pos	Pos	Pos	Neg
57	123	65	SUMBAR	2014	KOTA SOLOK	LUBUK SIKARAH	VI SUKU	Dog	Lokal	F	3 yr	Pos	Pos	Pos	Neg
58	133	86	SUMBAR	2014	AGAM	TANJUNG RAYA	MANINJAU	Dog	Lokal	M	1 mth	Pos	Pos	Pos	Neg
59	137	154	SUMBAR	2014	AGAM			Dog	Lokal			Pos	Pos	Pos	Neg
60	138	157	JAMBI	2014	KOTA SEI.PENUH	SUNGAI PENUH	TALANG LINDUNG	Dog	Lokal			Pos	Pos	Pos	Neg
61	1	12	SUMBAR	2012	AGAM	LUBUK BASUNG	Bulakan	Dog	Lokal	M	3 mth	Pos	Pos	Pos	Pos
62	4	53	SUMBAR	2012	SIJUNJUNG	KUPITAN	Batu Manjulur	Dog	Lokal	M	M	Pos	Pos	Pos	Pos
63	11	397	SUMBAR	2012	50 KOTA	HARAU	Gurun	Dog	Lokal	F	1 yr	Pos	Pos	Pos	Pos
64	15	459	SUMBAR	2012	AGAM	PALUPUH	Mudik	Dog	Lokal	M	2 yr	Pos	Pos	Pos	Pos
65	17	475	SUMBAR	2012	50 KOTA	SITUJUH LIMO NAGARI	Situjuh Batua	Dog	Lokal	F	Adult	Pos	Pos	Pos	Pos
66	19	480	SUMBAR	2012	50 KOTA	LUAK	Pakan Sabtu	Dog	Lokal	M	Adult	Pos	Pos	Pos	Pos
67	20	509	SUMBAR	2012	SIJUNJUNG	SIJUNJUNG	Kamang Baru	Dog	Lokal	M	Young	Pos	Pos	Pos	Pos
68	23	733	SUMBAR	2012	KOTA PADANG	PAUH	Limau Manis	Dog	Lokal	M	4 yr	Pos	Pos	Pos	Pos
69	25	24	SUMBAR	2013	50 KOTA	LUAK	TJG.HARO SI-KABU2	Dog	Lokal	-	Adult	Pos	Pos	Pos	Pos
70	29	53	SUMBAR	2013	50 KOTA	LUAK	NAGARI MUNGO	Dog	Lokal	M	3 mth	Pos	Pos	Pos	Pos
71	30	55	SUMBAR	2013	PADANG PANJANG	PADANG PANJANG TIMUR	SIGANDO	Dog	-	M	3 mth	Pos	Pos	Pos	Pos
72	33	63	SUMBAR	2013	AGAM	PALUPUH	KOTO RANTANG	Dog	-	-	4 yr	Pos	Pos	Pos	Pos
73	34	64	SUMBAR	2013	50 KOTA	LAREH SAGO HALABAN	SILANANG	Dog	Mix	M	-	Pos	Pos	Pos	Pos
74	36	73	SUMBAR	2013	AGAM	EMPAT ANGKAT	BATU TABA	Dog	Local	M	Adult	Pos	Pos	Pos	Pos
75	42	103	SUMBAR	2013	50 KOTA	SITUJUAH LIMO NAGARI	NAGARI SITUJUAH GADANG	Dog	Local	M	2 yr	Pos	Pos	Pos	Pos
76	47	160	SUMBAR	2013	50 KOTA	PAYAKUMBUH	TABING RANAH	Dog	Local	M	6 mth	Pos	Pos	Pos	Pos
77	48	183	SUMBAR	2013	PAYAKUMBUH	PAYAKUMBUH BARAT	PARIT RANTANG	Dog	-	M	3 mth	Pos	Pos	Pos	Pos
78	49	186	SUMBAR	2013	50 KOTA	PAYAKUMBUH	TAEH BARUAH	Dog	-	F	1,5 yr	Pos	Pos	Pos	Pos
79	50	196	SUMBAR	2013	SAWAH LUNTO	LEMBAH SEGAR	PONDOK BATU	Dog	Labrador	-	-	Pos	Pos	Pos	Pos
80	51	201	SUMBAR	2013	50 KOTA	PAYAKUMBUH	KOTO TANGAH	Dog	-	F	Adult	Pos	Pos	Pos	Pos
81	58	279	SUMBAR	2013	50 KOTA	LAREH SAGO HALABAN	BALAI PANJANG	Dog	Local	-	-	Pos	Pos	Pos	Pos
82	60	300	SUMBAR	2013	AGAM	EMPAT ANGKAT	BIARO GADANG	Dog	Local	M	6 mth	Pos	Pos	Pos	Pos
83	62	318	SUMBAR	2013				Dog	Local			Pos	Pos	Pos	Pos
84	71	438	SUMBAR	2013	50 KOTA	PANGKALAN KOTO BARU	KOTO ALAM	Dog	Local	M	Adult	Pos	Pos	Pos	Pos
85	72	447	SUMBAR	2013	AGAM	SUNGAI PUAR	SUNGAI PUAR	Dog	Local	M	1.5 yr	Pos	Pos	Pos	Pos
86	73	448	SUMBAR	2013	AGAM	TILATANG KAMANG	SUNGAI TUAK	Dog	Local	M	4 mth	Pos	Pos	Pos	Pos
87	74	460	SUMBAR	2013	BUKITTINGGI	AUR BIRUGO TIGO BALEH	BIRUGO PUHUN	Dog	Local	M	1 yr	Pos	Pos	Pos	Pos
88	79	537	SUMBAR	2013	AGAM	EMPAT ANGKAT	AMPANG GADANG	Dog	Local	F	Adult	Pos	Pos	Pos	Pos
89	80	544	SUMBAR	2013	50 KOTA	GUGUK	VIII KOTO	Dog	Labrador	-	Adult	Pos	Pos	Pos	Pos
90	81	609	SUMBAR	2013	TANAH DATAR	SUNGAI TARAB	RAO RAO	Dog	Local	M	Puppy	Pos	Pos	Pos	Pos
91	83	616	SUMBAR	2013	50 KOTA	HARAU	TARAM	Dog	-	M	-	Pos	Pos	Pos	Pos
92	84	621	SUMBAR	2013	SAWAH LUNTO	TALAWI	TUMPUAK TANGAH	Dog	Local	-	Adult	Pos	Pos	Pos	Pos
93	88	705	SUMBAR	2013	50 KOTA	HARAU	PULUTAN	Dog	Herder	M	9 yr	Pos	Pos	Pos	Pos
94	97	757	SUMBAR	2013	AGAM	CANDUNG	GANTIANG	Dog	Local	M	1,6 yr	Pos	Pos	Pos	Pos
95	103	17	SUMBAR	2014	50 KOTA	SITUJUAH LIMO NAGARI	SITUJUH BATUA	Dog	Local	F	1 yr	Pos	Pos	Pos	Pos
96	104	18	SUMBAR	2014	TANAH DATAR	SALIMPAUNG	SALIMPAUNG	Dog	Mix	M	5 mth	Pos	Pos	Pos	Pos
97	107	25	SUMBAR	2014	AGAM	LUBUK BASUNG	GUGUK	Dog	Local	M	Adult	Pos	Pos	Pos	Pos
98	108	28	SUMBAR	2014	AGAM	TANJUNG RAYA	KOTO KACIAK	Dog	Local	M	Adult	Pos	Pos	Pos	Pos
99	109	29	SUMBAR	2014	PASAMAN	BONJOL	PANDAM	Dog	Local	F	8 mth	Pos	Pos	Pos	Pos
100	110	30	SUMBAR	2014	AGAM	TANJUNG RAYA	SUNGAI BATANG	Dog	Local	F	8 mth	Pos	Pos	Pos	Pos
101	111	34	SUMBAR	2014	TANAH DATAR	X KOTO	TIGO SUKU BAURAH	Dog	Local	M		Pos	Pos	Pos	Pos
102	114	39	SUMBAR	2014	KAB. 50 KOTA	AKA BILURU	SARIAK LAWEH	Dog	Lokal	M	2 yr	Pos	Pos	Pos	Pos
103	115	42	SUMBAR	2014	KAB. 50 KOTA	GUGUAK	KUBANG	Dog	Lokal		1,5 yr	Pos	Pos	Pos	Pos
104	121	61	SUMBAR	2014	KOTA SAWAHLUNTO	BARANGIN	SARINGAN	Dog	Lokal	M	3 yr	Pos	Pos	Pos	Pos
105	122	64	SUMBAR	2014	LIMA PULUH KOTA	BUKIK BARISAN	KOTO TANGAH	Dog	Lokal	M	2 yr	Pos	Pos	Pos	Pos
106	129	74	SUMBAR	2014	PASIR JAMBAK	PASIA NAN TIGO	KOTO PADANG	Dog	Lokal			Pos	Pos	Pos	Pos
107	130	Ist-4	SUMBAR	2014	TANAH DATAR	SALIMPAUNG	MALINTANG	Dog	Lokal		4 yr	Pos	Pos	Pos	Pos
108	131	75	SUMBAR	2014	AGAM	TILATANG KAMANG	GADUT	Dog	Lokal	M	5 mth	Pos	Pos	Pos	Pos
109	132	79	SUMBAR	2014	AGAM	TANJUNG RAYA	NAG.DUO KOTO	Dog	Lokal	F	6 mth	Pos	Pos	Pos	Pos
110	135	94	SUMBAR	2014	TANAH DATAR	TANJUNG BARU	SAWAH PARIK	Dog	Lokal	F	6 mth	Pos	Pos	Pos	Pos
111	136	127	SUMBAR	2014	AGAM			Dog	Lokal			Pos	Pos	Pos	Pos
112	139	159	SUMBAR	2014	DHARMASRAYA			Dog	Lokal			Pos	Pos	Pos	Pos
113	140	161	SUMBAR	2014	PADANG			Dog	Lokal			Pos	Pos	Pos	Pos
114	141	165	SUMBAR	2014	50 KOTA			Dog	Lokal			Pos	Pos	Pos	Pos
115	142	176	SUMBAR	2014	SIJUNJUNG			Dog	Lokal			Pos	Pos	Pos	Pos
116	143	178	SUMBAR	2014	AGAM			Dog	Lokal			Pos	Pos	Pos	Pos
1	Negtaive area dog samples		DENPASAR Brain	2014				Dog				Neg	Neg	Neg	ND
2	Negtaive area dog samples		07 Mai 2014	2014				Dog				Neg	Neg	Neg	ND
3	Negtaive area dog samples		(Formalin)	2014				Dog				Neg	Neg	Neg	ND
4	Negtaive area dog samples			2014				Dog				Neg	Neg	Neg	ND
5	Negtaive area dog samples			2014				Dog				Neg	Neg	Neg	ND
6	Negtaive area dog samples			2014				Dog				Neg	Neg	Neg	ND
7	Negtaive area dog samples			2014				Dog				Neg	Neg	Neg	ND
8	Negtaive area dog samples			2014				Dog				Neg	Neg	Neg	ND
9	Negtaive area dog samples			2014				Dog				Neg	Neg	Neg	ND
10	Negtaive area dog samples			2014				Dog				Neg	Neg	Neg	ND
11	Negtaive area dog samples			2014				Dog				Neg	Neg	Neg	ND
12	Negtaive area dog samples			2014				Dog				Neg	Neg	Neg	ND
13	Negtaive area dog samples			2014				Dog				Neg	Neg	Neg	ND
14	Negtaive area dog samples			2014				Dog				Neg	Neg	Neg	ND
15	Negtaive area dog samples			2014				Dog				Neg	Neg	Neg	ND
16	Negtaive area dog samples		Denpasar Brain	2014				Dog				Neg	Neg	Neg	ND
17	Negtaive area dog samples		12 Mei 2014	2014				Dog				Neg	Neg	Neg	ND
18	Negtaive area dog samples			2014				Dog				Neg	Neg	Neg	ND
19	Negtaive area dog samples			2014				Dog				Neg	Neg	Neg	ND
20	Negtaive area dog samples			2014				Dog				Neg	Neg	Neg	ND
21	Negtaive area dog samples			2014				Dog				Neg	Neg	Neg	ND
22	Negtaive area dog samples			2014				Dog				Neg	Neg	Neg	ND
23	Negtaive area dog samples			2014				Dog				Neg	Neg	Neg	ND
24	Negtaive area dog samples			2014				Dog				Neg	Neg	Neg	ND
25	Negtaive area dog samples			2014				Dog				Neg	Neg	Neg	ND
26	Negtaive area dog samples			2014				Dog				Neg	Neg	Neg	ND
27	Negtaive area dog samples			2014				Dog				Neg	Neg	Neg	ND
28	Negtaive area dog samples			2014				Dog				Neg	Neg	Neg	ND
29	Negtaive area dog samples			2014				Dog				Neg	Neg	Neg	ND
30	Negtaive area dog samples			2014				Dog				Neg	Neg	Neg	ND
31	Negtaive area dog samples		Meranti Island	2014	Tebing Tinggi Barat			Dog				Neg	Neg	Neg	Neg
32	Negtaive area dog samples		West Sumatera	2014	Tebing Tinggi Barat			Dog				Neg	Neg	Neg	Neg
33	Negtaive area dog samples			2014	Tebing Tinggi Barat			Dog				Neg	Neg	Neg	Neg
34	Negtaive area dog samples			2014	Tebing Tinggi Barat			Dog				Neg	Neg	Neg	Neg
35	Negtaive area dog samples			2014	Tebing Tinggi Barat			Dog				Neg	Neg	Neg	Neg
36	Negtaive area dog samples			2014	Tebing Tinggi Barat			Dog				Neg	Neg	Neg	Neg
37	Negtaive area dog samples			2014	Tebing Tinggi Barat			Dog				Neg	Neg	Neg	Neg
38	Negtaive area dog samples			2014	Merbow			Dog				Neg	Neg	Neg	Neg
39	Negtaive area dog samples			2014	Merbow			Dog				Neg	Neg	Neg	Neg
40	Negtaive area dog samples			2014	Rangsang Barat			Dog				Neg	Neg	Neg	Neg
41	Negtaive area dog samples			2014	Rangsang Barat			Dog				Neg	Neg	Neg	Neg
42	Negtaive area dog samples			2014	Rangsang Barat			Dog				Neg	Neg	Neg	Neg
43	Negtaive area dog samples			2014	Rangsang Barat			Dog				Neg	Neg	Neg	Neg
44	Negtaive area dog samples			2014	Rangsang Barat			Dog				Neg	Neg	Neg	Neg
45	Negtaive area dog samples			2014	Rangsang Barat			Dog				Neg	Neg	Neg	Neg
46	Negtaive area dog samples			2014	Tebing Tinggi			Dog				Neg	Neg	Neg	Neg
47	Negtaive area dog samples			2014	Tebing Tinggi			Dog				Neg	Neg	Neg	Neg
48	Negtaive area dog samples			2014	Tebing Tinggi			Dog				Neg	Neg	Neg	Neg
49	Negtaive area dog samples			2014	Tebing Tinggi			Dog				Neg	Neg	Neg	Neg
50	Negtaive area dog samples			2014	Tebing Tinggi			Dog				Neg	Neg	Neg	Neg
51	Negtaive area dog samples			2014	Tebing Tinggi			Dog				Neg	Neg	Neg	Neg
52	Negtaive area dog samples			2014	Tebing Tinggi			Dog				Neg	Neg	Neg	Neg
53	Negtaive area dog samples			2014	Tebing Tinggi			Dog				Neg	Neg	Neg	Neg
54	Negtaive area dog samples			2014	Tebing Tinggi			Dog				Neg	Neg	Neg	Neg
55	Negtaive area dog samples			2014	Tebing Tinggi			Dog				Neg	Neg	Neg	Neg
56	Negtaive area dog samples			2014	Tebing Tinggi			Dog				Neg	Neg	Neg	Neg
57	Negtaive area dog samples			2014	Tebing Tinggi			Dog				Neg	Neg	Neg	Neg
58	Negtaive area dog samples			2014	Tebing Tinggi			Dog				Neg	Neg	Neg	Neg
59	Negtaive area dog samples			2014	Tebing Tinggi			Dog				Neg	Neg	Neg	Neg
60	Negtaive area dog samples			2014	Tebing Tinggi			Dog				Neg	Neg	Neg	Neg
61	Negtaive area dog samples			2014	Tebing Tinggi			Dog				Neg	Neg	Neg	Neg
62	Negtaive area dog samples			2014	Tebing Tinggi			Dog				Neg	Neg	Neg	Neg
63	Negtaive area dog samples			2014	Tebing Tinggi			Dog				Neg	Neg	Neg	Neg
64	Negtaive area dog samples			2014	Tebing Tinggi			Dog				Neg	Neg	Neg	Neg
65	Negtaive area dog samples			2014	Tebing Tinggi			Dog				Neg	Neg	Neg	Neg
66	Negtaive area dog samples			2014	Tebing Tinggi			Dog				Neg	Neg	Neg	Neg
67	Negtaive area dog samples			2014	Tebing Tinggi			Dog				Neg	Neg	Neg	Neg
68	Negtaive area dog samples			2014	Tebing Tinggi			Dog				Neg	Neg	Neg	Neg
69	Negtaive area dog samples			2014	Tebing Tinggi			Dog				Neg	Neg	Neg	Neg
70	Negtaive area dog samples			2014	Tebing Tinggi			Dog				Neg	Neg	Neg	Neg
71	Negtaive area dog samples			2014	Tebing Tinggi			Dog				Neg	Neg	Neg	Neg
72	Negtaive area dog samples			2014	Tebing Tinggi			Dog				Neg	Neg	Neg	Neg
73	Negtaive area dog samples			2014	Tebing Tinggi			Dog				Neg	Neg	Neg	Neg
74	Negtaive area dog samples			2014	Tebing Tinggi			Dog				Neg	Neg	Neg	Neg
75	Negtaive area dog samples			2014	Tebing Tinggi			Dog				Neg	Neg	Neg	Neg
76	Negtaive area dog samples			2014	Tebing Tinggi			Dog				Neg	Neg	Neg	Neg
77	Negtaive area dog samples			2014	Tebing Tinggi			Dog				Neg	Neg	Neg	Neg
78	Negtaive area dog samples			2014	Tebing Tinggi			Dog				Neg	Neg	Neg	Neg
79	Negtaive area dog samples			2014	Tebing Tinggi			Dog				Neg	Neg	Neg	Neg
80	Negtaive area dog samples			2014	Tebing Tinggi			Dog				Neg	Neg	Neg	Neg
81	Negtaive area dog samples			2014	Tebing Tinggi			Dog				Neg	Neg	Neg	Neg
82	Negtaive area dog samples			2014	Tebing Tinggi			Dog				Neg	Neg	Neg	Neg
83	Negtaive area dog samples			2014	Tebing Tinggi			Dog				Neg	Neg	Neg	Neg
84	Negtaive area dog samples			2014	Tebing Tinggi			Dog				Neg	Neg	Neg	Neg
85	Negtaive area dog samples			2014	Tebing Tinggi			Dog				Neg	Neg	Neg	Neg
86	Negtaive area dog samples			2014	Tebing Tinggi			Dog				Neg	Neg	Neg	Neg
87	Negtaive area dog samples			2014	Tebing Tinggi			Dog				Neg	Neg	Neg	Neg
88	Negtaive area dog samples			2014	Tebing Tinggi			Dog				Neg	Neg	Neg	Neg
89	Negtaive area dog samples			2014	Tebing Tinggi			Dog				Neg	Neg	Neg	Neg
90	Negtaive area dog samples			2014	Tebing Tinggi			Dog				Neg	Neg	Neg	Neg
91	Negtaive area dog samples			2014	Tebing Tinggi			Dog				Neg	Neg	Neg	Neg
92	Negtaive area dog samples			2014	Tebing Tinggi			Dog				Neg	Neg	Neg	Neg
93	Negtaive area dog samples			2014	Tebing Tinggi			Dog				Neg	Neg	Neg	Neg
94	Negtaive area dog samples			2014	Tebing Tinggi			Dog				Neg	Neg	Neg	Neg
95	Negtaive area dog samples			2014	Tebing Tinggi			Dog				Neg	Neg	Neg	Neg
96	Negtaive area dog samples		Mentawai Island	2014	South Siberut			Dog				Neg	Neg	Neg	Neg
97	Negtaive area dog samples		West Sumatera	2014	South Siberut			Dog				Neg	Neg	Neg	Neg
98	Negtaive area dog samples			2014	South Siberut			Dog				Neg	Neg	Neg	Neg
99	Negtaive area dog samples			2014	South Siberut			Dog				Neg	Neg	Neg	Neg
100	Negtaive area dog samples			2014	South Siberut			Dog				Neg	Neg	Neg	Neg
101	Negtaive area dog samples			2014	South Siberut			Dog				Neg	Neg	Neg	Neg
102	Negtaive area dog samples			2014	North Siberut			Dog				Neg	Neg	Neg	Neg
103	Negtaive area dog samples			2014	North Siberut			Dog				Neg	Neg	Neg	Neg
104	Negtaive area dog samples			2014	North Siberut			Dog				Neg	Neg	Neg	Neg
105	Negtaive area dog samples			2014	North Siberut			Dog				Neg	Neg	Neg	Neg
106	Negtaive area dog samples			2014	North Siberut			Dog				Neg	Neg	Neg	Neg
107	Negtaive area dog samples			2014	Central Siberut			Dog				Neg	Neg	Neg	Neg
108	Negtaive area dog samples			2014	Central Siberut			Dog				Neg	Neg	Neg	Neg
109	Negtaive area dog samples			2014	Central Siberut			Dog				Neg	Neg	Neg	Neg
110	Negtaive area dog samples			2014	Central Siberut			Dog				Neg	Neg	Neg	Neg
